# Supplementary material for: Room temperature hydroamination of alkynes with anilines catalyzed by anti-Bredt di(amino)carbene gold(i) complexes
Source: Royal Society of Chemistry journal article supplement (doi:10.1039/c6nj00980h), 2016-01-01
Supplement: c6nj00980h1.pdf [file c6nj00980h1.pdf]

## Room temperature hydroamination of alkynes with anilines catalyzed by anti-Bredt di(amino)carbene gold(I) complexes.

Xingbang Hu,<sup>a,b</sup> David Martin,<sup>a,c</sup> and Guy Bertrand<sup>a</sup>

<sup>a</sup>UCSD-CNRS Joint Research Laboratory (UMI 3555), Department of Chemistry and Biochemistry, University of California, San Diego, La Jolla, California 92093-0343, United States

<sup>b</sup>present address: School of Chemistry and Chemical Engineering, Nanjing University, Nanjing 210093, P. R. China

<sup>c</sup>present address: UMR CNRS 5250, Département de Chimie Moléculaire, Université Grenoble Alpes B. P. 53, 38041 Cedex 9 Grenoble, France

### Index:

1. <sup>13</sup>C NMR, <sup>1</sup>H NMR and MS data for the hydroamination products
2. Hydrolysis of 3a under air
3. Original NMR spectra of Hydroamination products

### 1. <sup>13</sup>C NMR, <sup>1</sup>H NMR and MS data for the hydroamination products

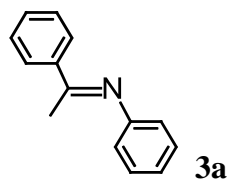

<sup>13</sup>C NMR (75 MHz, C<sub>6</sub>D<sub>6</sub>) δ 164.43, 152.13, 139.46, 130.22, 128.93, 128.10, 127.29, 123.04, 119.38, 16.48. <sup>1</sup>H NMR (300 MHz, C<sub>6</sub>D<sub>6</sub>) δ 7.95 – 7.92 (t, 2H), 7.22 – 7.17(m,5H), 6.97 – 6.92(t, 1H), 6.76 – 6.74(d, 2H), 1.84(s, 3H). MS calculated m/e for C<sub>14</sub>H<sub>13</sub>N: 195.1, found: 195.3 (Relative abundance: 48%). Calculated [M-CH<sub>3</sub>]: 108.1, found: 108.3 (Relative abundance: 100%).

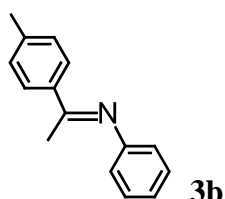

$^{13}\text{C}$  NMR (75 MHz,  $\text{C}_6\text{D}_6$ )  $\delta$  164.50, 152.18, 140.36, 136.91, 128.92, 128.89, 127.34, 122.97, 119.50, 20.90, 16.53.  $^1\text{H}$  NMR (300 MHz,  $\text{C}_6\text{D}_6$ )  $\delta$  7.90 (d,  $J = 7.5$  Hz, 2H), 7.19 (t,  $J = 7.8$  Hz, 2H), 7.00 – 7.03 (m, 3H), 6.75 (d,  $J = 7.5$  Hz, 2H), 2.10 (s, 3H), 1.87 (s, 3H). MS calculated m/e for  $\text{C}_{15}\text{H}_{15}\text{N}$ : 209.1, found: 209.2 (Relative abundance: 43%). Calculated  $[\text{M}-\text{CH}_3]$ : 194.1, found: 194.2 (Relative abundance: 100%).

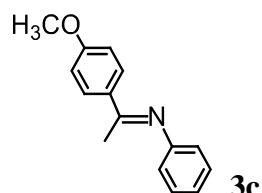

$^{13}\text{C}$  NMR (75 MHz,  $\text{C}_6\text{D}_6$ )  $\delta$  163.72, 161.71, 152.32, 132.15, 128.99, 128.92, 122.87, 119.65, 113.49, 54.56, 16.40.  $^1\text{H}$  NMR (300 MHz,  $\text{C}_6\text{D}_6$ )  $\delta$  7.94 (d,  $J = 8.5$  Hz, 2H), 7.20 (t,  $J = 7.5$  Hz, 2H), 6.95 (t,  $J = 7.5$  Hz, 1H), 6.78 (d,  $J = 8.5$  Hz, 4H), 3.31 (s, 3H), 1.89 (s, 3H). MS calculated m/e for  $\text{C}_{15}\text{H}_{15}\text{NO}$ : 225.1, found: 225.2 (Relative abundance: 40%). Calculated  $[\text{M}-\text{CH}_3]$ : 210.1, found: 210.2 (Relative abundance: 100%).

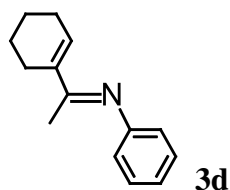

$^{13}\text{C}$  NMR (75 MHz,  $\text{C}_6\text{D}_6$ )  $\delta$  165.88, 152.52, 139.46, 133.30, 128.79, 122.62, 119.35, 26.01, 24.71, 22.59, 22.07, 15.22.  $^1\text{H}$  NMR (300 MHz,  $\text{C}_6\text{D}_6$ )  $\delta$  7.19 – 7.14 (m, 2H), 6.91 (t,  $J = 7.4$  Hz, 1H), 6.69 (d,  $J = 7.2$  Hz, 2H), 6.16 (t,  $J = 4.0$  Hz, 1H), 2.60 – 2.56 (m, 2H), 2.00 – 1.95 (m, 2H), 1.69 (s, 3H), 1.59~1.51 (m, 2H), 1.48~1.40 (m, 2H). MS calculated m/e for  $\text{C}_{14}\text{H}_{17}\text{N}$ : 199.1, found: 199.3 (Relative abundance: 30%). Calculated  $[\text{M}-\text{C}_6\text{H}_9]$ : 118.1, found: 118.1 (Relative abundance: 100%).

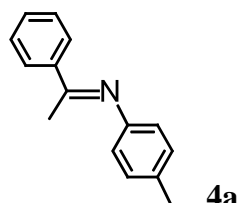

$^{13}\text{C}$  NMR (75 MHz,  $\text{C}_6\text{D}_6$ )  $\delta$  164.46, 149.55, 139.66, 132.19, 130.12, 129.53, 128.09, 127.25, 119.45, 20.51, 16.45.  $^1\text{H}$  NMR (300 MHz,  $\text{C}_6\text{D}_6$ )  $\delta$  7.95 (br, 2H), 7.24 – 7.15 (m, 3H), 7.01 (d,  $J = 7.8$  Hz, 2H), 6.70 (d,  $J = 7.8$  Hz, 2H), 2.16 (s, 3H), 1.89 (s, 3H). MS calculated m/e for  $\text{C}_{15}\text{H}_{15}\text{N}$ : 209.1, found: 209.3 (Relative abundance: 53%). Calculated  $[\text{M}-\text{CH}_3]$ : 194.1, found: 194.3 (Relative abundance: 100%).

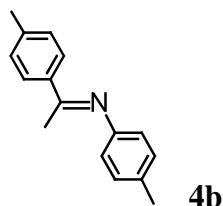

$^{13}\text{C}$  NMR (75 MHz,  $\text{C}_6\text{D}_6$ )  $\delta$  164.16, 149.71, 140.18, 137.10, 131.99, 129.51, 128.86, 127.33, 119.55, 20.91, 20.53, 16.41.  $^1\text{H}$  NMR (300 MHz,  $\text{C}_6\text{D}_6$ )  $\delta$  7.93 (d,  $J = 8.0$  Hz, 2H), 7.03 (d,  $J = 7.6$  Hz, 2H), 7.01 (d,  $J = 7.6$  Hz, 2H), 6.71 (d,  $J = 8.0$  Hz, 2H), 2.16 (s, 3H), 2.12 (s, 3H), 1.93 (s, 3H). MS calculated  $m/e$  for  $\text{C}_{16}\text{H}_{17}\text{N}$ : 223.1, found: 223.2 (Relative abundance: 38%). Calculated  $[\text{M}-\text{CH}_3]$ : 208.1, found: 208.2 (Relative abundance: 100%).

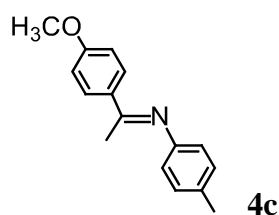

$^{13}\text{C}$  NMR (75 MHz,  $\text{C}_6\text{D}_6$ )  $\delta$  163.58, 161.62, 149.79, 132.37, 131.92, 129.52, 128.94, 119.68, 113.47, 54.55, 20.52, 16.33.  $^1\text{H}$  NMR (300 MHz,  $\text{C}_6\text{D}_6$ )  $\delta$  7.96 (d,  $J = 8.1$  Hz, 2H), 7.02 (d,  $J = 7.8$  Hz, 2H), 6.79 (d,  $J = 8.1$  Hz, 2H), 6.72 (d,  $J = 7.8$  Hz, 2H), 3.33 (s, 3H), 2.17 (s, 3H), 1.93 (s, 3H). MS calculated  $m/e$  for  $\text{C}_{16}\text{H}_{17}\text{NO}$ : 239.1, found: 239.2 (Relative abundance: 41%). Calculated  $[\text{M}-\text{CH}_3]$ : 224.1, found: 224.1 (Relative abundance: 100%).

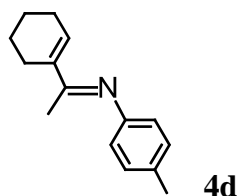

$^{13}\text{C}$  NMR (75 MHz,  $\text{C}_6\text{D}_6$ )  $\delta$  165.62, 150.04, 139.70, 132.85, 131.60, 129.37, 119.37, 26.03, 24.77, 22.64, 22.14, 20.47, 15.11.  $^1\text{H}$  NMR (300 MHz,  $\text{C}_6\text{D}_6$ )  $\delta$  6.99 (d,  $J = 8.0$  Hz, 2H), 6.64 (d,  $J = 8.0$  Hz, 2H), 6.18 (t,  $J = 4.0$  Hz, 1H), 2.62 (br, 2H), 2.15 (s, 3H), 2.01 – 1.98 (m, 2H), 1.74 (s, 3H), 1.61 – 1.53 (m, 2H), 1.49 – 1.44 (m, 2H). MS calculated  $m/e$  for  $\text{C}_{15}\text{H}_{19}\text{N}$ : 213.2, found: 213.3 (Relative abundance: 26%). Calculated  $[\text{M}-\text{C}_6\text{H}_9]$ : 132.1, found: 132.1 (Relative abundance: 100%).

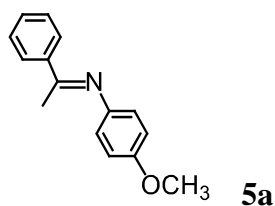

$^{13}\text{C}$  NMR (75 MHz,  $\text{C}_6\text{D}_6$ )  $\delta$  164.56, 156.22, 145.09, 139.80, 130.08, 128.10, 127.23, 120.79, 114.32, 54.71, 16.42.  $^1\text{H}$  NMR (300 MHz,  $\text{C}_6\text{D}_6$ )  $\delta$  8.09 – 7.92 (m, 2H), 7.26 – 7.16 (m, 3H), 6.81 (d,  $J$  = 8.8 Hz, 2H), 6.71 (d,  $J$  = 8.8 Hz, 2H), 3.37 (s, 3H), 1.92 (s, 3H). MS calculated  $m/e$  for  $\text{C}_{15}\text{H}_{15}\text{NO}$ : 225.1, found: 225.2 (Relative abundance: 59%). Calculated  $[\text{M}-\text{CH}_3]$ : 210.1, found: 210.2 (Relative abundance: 100%).

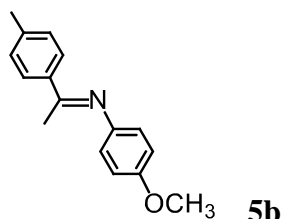

$^{13}\text{C}$  NMR (75 MHz,  $\text{C}_6\text{D}_6$ )  $\delta$  164.35, 156.11, 145.25, 140.14, 137.24, 128.87, 127.30, 120.86, 114.29, 54.70, 20.91, 16.40.  $^1\text{H}$  NMR (300 MHz,  $\text{C}_6\text{D}_6$ )  $\delta$  7.94 (d,  $J$  = 8.0 Hz, 2H), 7.04 (d,  $J$  = 8.0 Hz, 2H), 6.80 (d,  $J$  = 8.8 Hz, 2H), 6.72 (d,  $J$  = 8.8 Hz, 2H), 3.38 (s, 3H), 2.12 (s, 3H), 1.95 (s, 3H). MS calculated  $m/e$  for  $\text{C}_{16}\text{H}_{17}\text{NO}$ : 239.1, found: 239.2 (Relative abundance: 48%). Calculated  $[\text{M}-\text{CH}_3]$ : 224.1, found: 224.1 (Relative abundance: 100%).

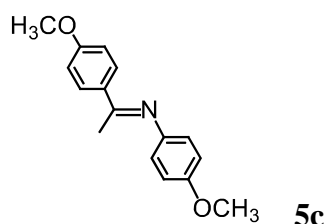

$^{13}\text{C}$  NMR (75 MHz,  $\text{CDCl}_3$ )  $\delta$  164.94, 161.48, 155.84, 145.01, 132.47, 128.77, 120.92, 114.25, 113.60, 55.48, 55.37, 17.11.  $^1\text{H}$  NMR (300 MHz,  $\text{CDCl}_3$ )  $\delta$  7.96 (d,  $J$  = 8.6 Hz, 2H), 7.97 (d,  $J$  = 9.0 Hz, 2H), 7.93 (d,  $J$  = 9.0 Hz, 2H), 6.77 (d,  $J$  = 8.6 Hz, 2H), 3.88 (s, 3H), 3.83 (s, 3H), 2.24 (s, 3H). MS calculated  $m/e$  for  $\text{C}_{16}\text{H}_{17}\text{NO}_2$ : 255.1, found: 255.2 (Relative abundance: 50%). Calculated  $[\text{M}-\text{CH}_3]$ : 240.1, found: 240.2 (Relative abundance: 100%).

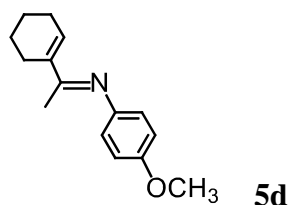

$^{13}\text{C}$  NMR (75 MHz,  $\text{C}_6\text{D}_6$ )  $\delta$  165.69, 155.83, 145.68, 139.86, 132.68, 120.60, 114.17, 54.68, 26.05, 24.81, 22.68, 22.18, 15.05.  $^1\text{H}$  NMR (300 MHz,  $\text{C}_6\text{D}_6$ )  $\delta$  6.78 (d,  $J$  = 8.8 Hz, 2H), 6.65 (d,  $J$  = 8.8 Hz, 2H), 6.21 – 6.18 (m, 1H), 3.38 (s, 3H), 2.65 – 2.62 (m, 2H), 2.05 – 1.95 (m, 2H), 1.77 (s, 3H), 1.60 – 1.55 (m, 2H), 1.50 – 1.44 (m, 2H). MS

calculated m/e for C<sub>15</sub>H<sub>19</sub>NO: 229.2, found: 229.3 (Relative abundance: 26%).  
Calculated [M-C<sub>6</sub>H<sub>9</sub>]: 148.1, found: 148.1 (Relative abundance: 100%).

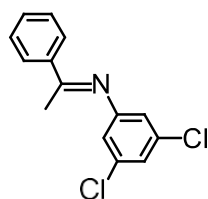

**6a**

<sup>13</sup>C NMR (75 MHz, C<sub>6</sub>D<sub>6</sub>) δ 166.43, 153.91, 138.47, 135.23, 130.81, 128.18, 127.29, 122.85, 117.90, 16.63. <sup>1</sup>H NMR (300 MHz, C<sub>6</sub>D<sub>6</sub>) δ 7.77 (d, *J* = 7.8 Hz, 2H), 7.18 (br, 3H), 6.93 (s, 1H), 6.49 (s, 2H), 1.59 (s, 3H). MS calculated m/e for C<sub>14</sub>H<sub>11</sub>Cl<sub>2</sub>N: 263.0, found: 263.1 (Relative abundance: 42%). Calculated [M-CH<sub>3</sub>]: 248.0, found: 248.1 (Relative abundance: 100%).

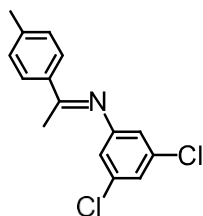

**6b**

<sup>13</sup>C NMR (75 MHz, C<sub>6</sub>D<sub>6</sub>) δ 166.06, 154.16, 141.11, 135.90, 135.15, 128.96, 127.37, 122.65, 118.01, 20.96, 16.59. <sup>1</sup>H NMR (300 MHz, C<sub>6</sub>D<sub>6</sub>) δ 7.76 (d, *J* = 8.0 Hz, 2H), 7.01 (d, *J* = 8.0 Hz, 2H), 6.92 (s, 1H), 6.51 (s, 1H), 6.51 (s, 1H), 2.12 (s, 3H), 1.65 (s, 3H). MS calculated m/e for C<sub>15</sub>H<sub>13</sub>Cl<sub>2</sub>N: 277.0, found: 277.2 (Relative abundance: 42%). Calculated [M-CH<sub>3</sub>]: 262.0, found: 262.1 (Relative abundance: 100%).

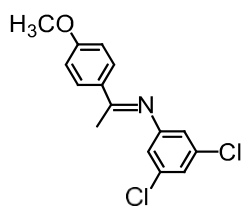

**6c**

<sup>13</sup>C NMR (75 MHz, C<sub>6</sub>D<sub>6</sub>) δ 165.49, 162.11, 154.24, 135.15, 131.13, 129.12, 122.59, 118.21, 113.55, 54.59, 16.51. <sup>1</sup>H NMR (300 MHz, C<sub>6</sub>D<sub>6</sub>) δ 7.80 (d, *J* = 8.7 Hz, 2H), 6.93 (s, 1H), 6.77 (d, *J* = 8.7 Hz, 2H), 6.54 (s, 2H), 3.34 (s, 3H), 1.66 (s, 3H). MS calculated m/e for C<sub>15</sub>H<sub>13</sub>Cl<sub>2</sub>NO: 293.0, found: 293.2 (Relative abundance: 30%). Calculated [M-CH<sub>3</sub>]: 278.0, found: 278.1 (Relative abundance: 100%).

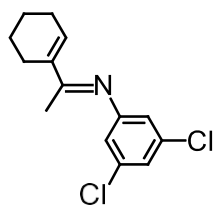

**6d**

$^{13}\text{C}$  NMR (75 MHz,  $\text{C}_6\text{D}_6$ )  $\delta$  167.14, 154.59, 138.89, 135.02, 134.76, 122.23, 117.84, 26.05, 24.45, 22.44, 21.93, 15.25.  $^1\text{H}$  NMR (300 MHz,  $\text{C}_6\text{D}_6$ )  $\delta$  6.90 (s, 1H), 6.46 (s, 1H), 6.47 (s, 1H), 6.12 (t,  $J = 4.0$  Hz, 1H), 2.43 – 2.40 (m, 2H), 1.55 – 1.52 (m, 2H), 1.47 (s, 3H), 1.45 – 1.41 (m, 2H). MS calculated  $m/e$  for  $\text{C}_{14}\text{H}_{15}\text{Cl}_2\text{N}$ : 267.1, found: 267.2 (Relative abundance: 100%). Calculated  $[\text{M}-\text{C}_6\text{H}_9]$ : 186.0, found: 186.0 (Relative abundance: 41%).

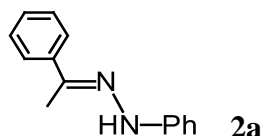

$^{13}\text{C}$  NMR (75 MHz,  $\text{C}_6\text{D}_6$ )  $\delta$  145.54, 140.80, 139.32, 129.24, 128.26, 128.22, 125.56, 120.13, 113.39, 10.76.  $^1\text{H}$  NMR (300 MHz,  $\text{C}_6\text{D}_6$ )  $\delta$  7.73 (d,  $J = 7.6$  Hz, 2H), 7.28 – 7.21 (m, 3H), 7.18 – 7.12 (m,  $J = 5.3$  Hz, 3H), 6.86 (t,  $J = 7.0$  Hz, 2H), 1.45 (s, 3H). MS calculated  $m/e$  for  $\text{C}_{14}\text{H}_{14}\text{N}_2$ : 210.1, found: 210.1 (Relative abundance: 100%). Calculated  $[\text{M}-\text{C}_6\text{H}_6\text{N}]$ : 118.1, found: 118.1 (Relative abundance: 52%).

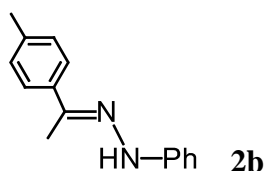

$^{13}\text{C}$  NMR (75 MHz,  $\text{C}_6\text{D}_6$ )  $\delta$  145.68, 141.08, 137.42, 136.65, 129.20, 128.96, 125.54, 119.98, 113.37, 20.83, 10.80.  $^1\text{H}$  NMR (300 MHz,  $\text{C}_6\text{D}_6$ )  $\delta$  7.69 (d,  $J = 8.1$  Hz, 2H), 7.23 – 7.21 (m, 2H), 7.18 – 7.15 (m, 2H), 7.05 (d,  $J = 8.1$  Hz, 2H), 6.85 (t,  $J = 7.2$  Hz, 1H), 2.14 (s, 3H), 1.51 (s, 3H). MS calculated  $m/e$  for  $\text{C}_{15}\text{H}_{16}\text{N}_2$ : 224.1, found: 224.2 (Relative abundance: 92%).

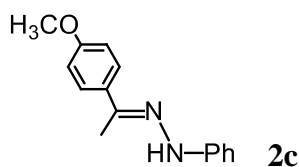

$^{13}\text{C}$  NMR (75 MHz,  $\text{C}_6\text{D}_6$ )  $\delta$  159.84, 145.86, 140.76, 132.11, 129.20, 126.87, 119.91, 113.70, 113.34, 54.49, 10.80.  $^1\text{H}$  NMR (300 MHz,  $\text{C}_6\text{D}_6$ )  $\delta$  7.73 (d,  $J = 8.9$  Hz, 2H), 7.26 – 7.19 (m, 4H), 6.90 – 6.87 (m, 1H), 6.84 (d,  $J = 8.9$  Hz, 2H), 3.33 (s, 3H), 1.50 (s, 3H). MS calculated  $m/e$  for  $\text{C}_{15}\text{H}_{16}\text{N}_2\text{O}$ : 240.1, found: 240.1 (Relative abundance: 100%). Calculated  $[\text{M}-\text{C}_6\text{H}_6\text{N}]$ : 148.0, found: 148.0 (Relative abundance: 86%).

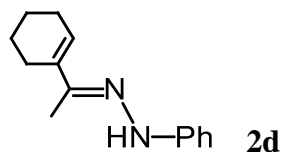

$^{13}\text{C}$  NMR (75 MHz,  $\text{C}_6\text{D}_6$ )  $\delta$  145.94, 142.93, 137.56, 129.12, 125.66, 119.68, 113.18, 26.01, 24.77, 22.87, 22.57, 9.08.  $^1\text{H}$  NMR (300 MHz,  $\text{C}_6\text{D}_6$ )  $\delta$  7.29 – 7.19 (m, 2H),

7.15 – 7.10 (m, 2H), 6.84 (t,  $J = 7.2$  Hz, 1H), 5.80 (t,  $J = 4.2$  Hz, 1H), 2.65 – 2.60 (m, 2H), 2.07 – 2.02 (m, 2H), 1.66 – 1.58 (m, 2H), 1.55 – 1.49 (m, 2H), 1.38 (s, 3H). MS calculated  $m/e$  for  $C_{14}H_{18}N_2$ : 214.2, found: 214.2 (Relative abundance: 100%). Calculated  $[M-C_6H_6N]$ : 122.1, found: 122.1 (Relative abundance: 23%).

## 2. Hydrolysis of **3a** in air

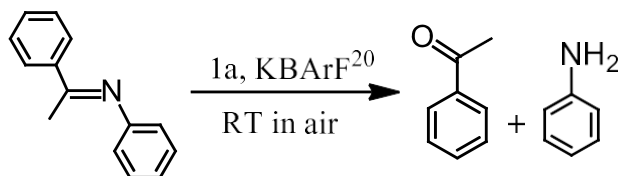

The  $C_6D_6$  solution of **3a**, 5 mol% catalyst **1a**, and 5 mol% KBarF was kept under air for 24 hours. The following  $^{13}C$  NMR was obtained. It shows that **2a** was partially hydrolyzed to acetophenone and aniline.

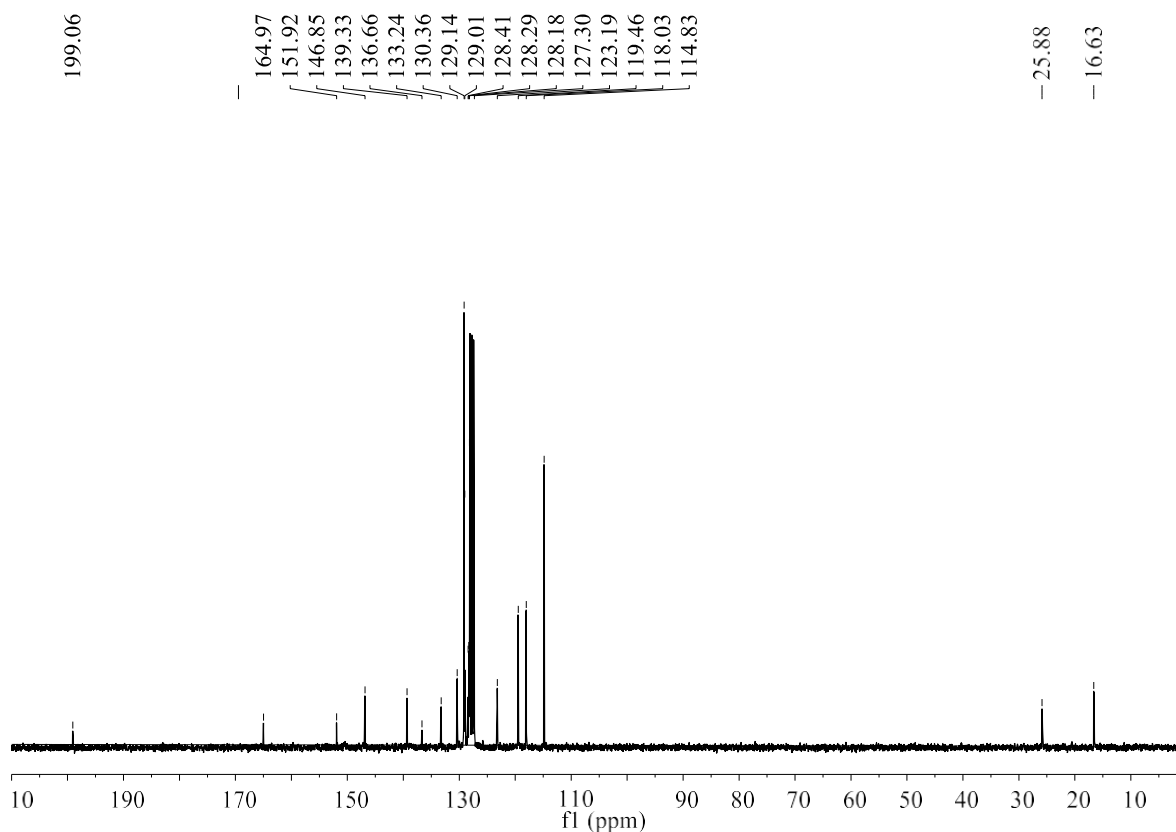

Figure S1.  $^{13}C$  NMR monitoring the hydrolysis of **2a** in air.

### 3. Original NMR spectra of Hydroamination products

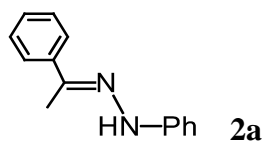

$^{13}\text{C}$  NMR

145.54  
140.80  
139.32  
129.24  
128.26  
128.22  
125.56  
120.13  
113.39

-10.76

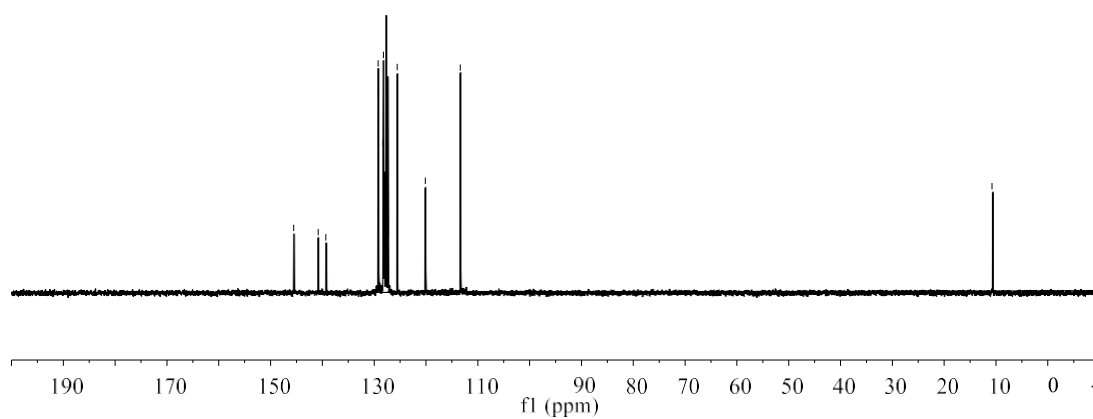

$^1\text{H}$  NMR

7.74  
7.71  
7.26  
7.24  
7.21  
7.18  
7.17  
7.12  
6.89  
6.86  
6.84

-1.45

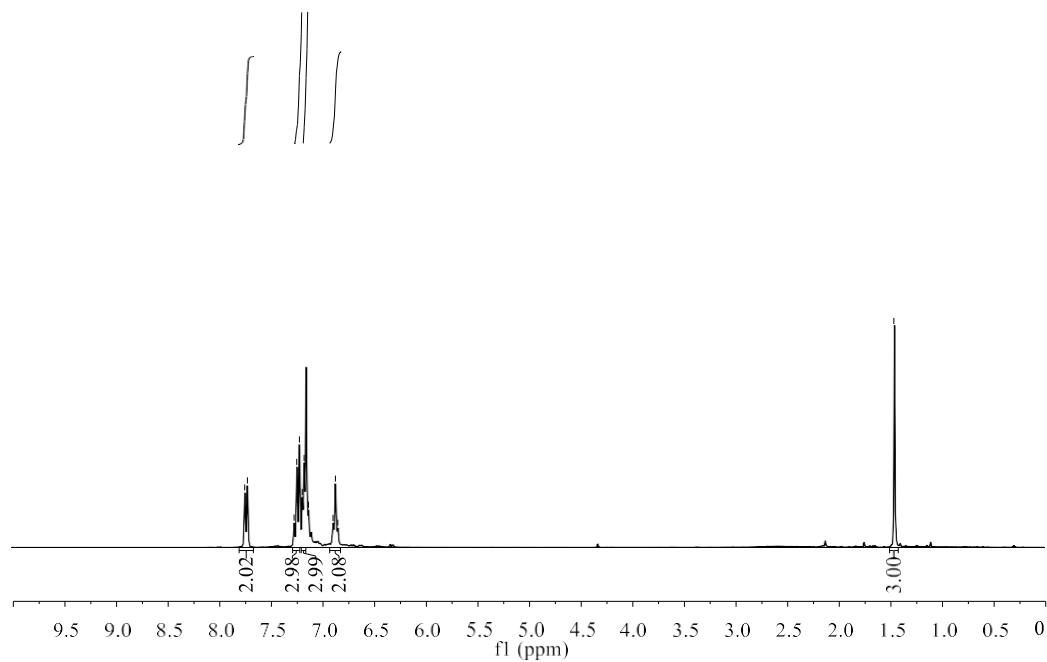



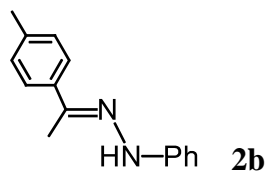

$^{13}\text{C}$  NMR

145.68  
141.08  
137.42  
136.65  
129.20  
128.96  
125.54  
119.98  
113.37

-20.83  
-10.80

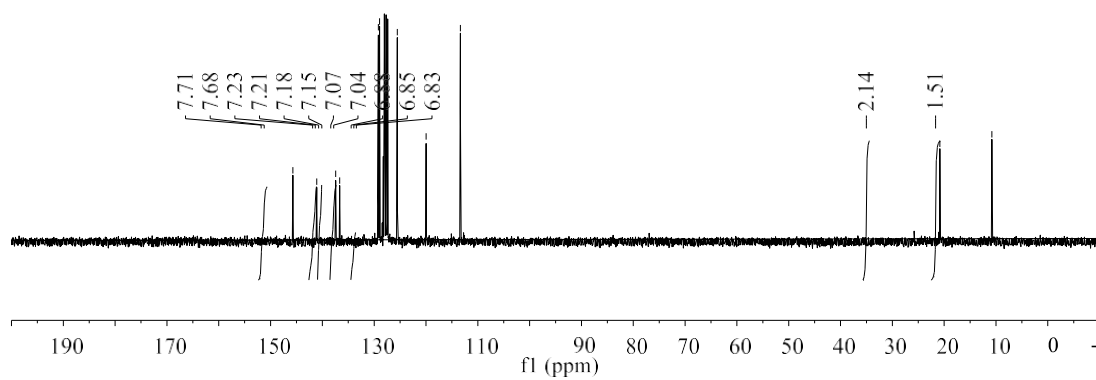

$^1\text{H}$  NMR

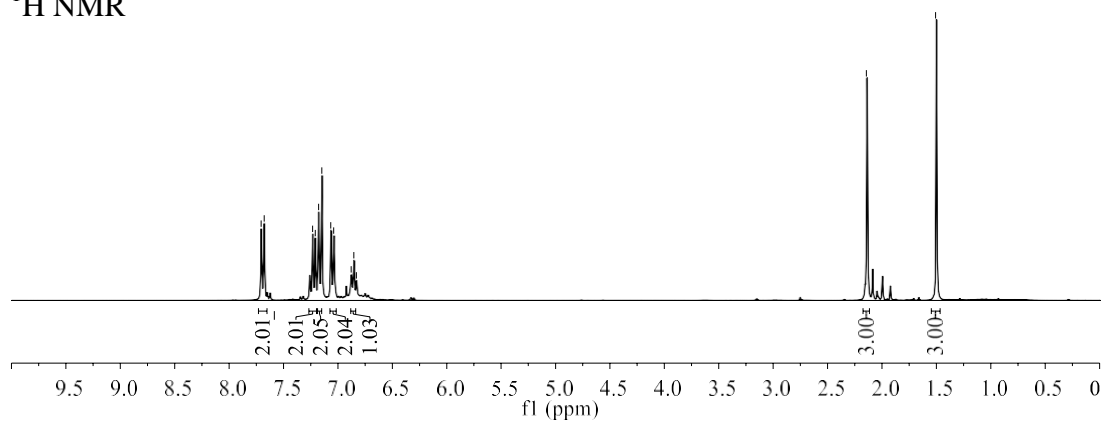

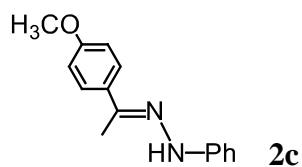

$^{13}\text{C}$  NMR

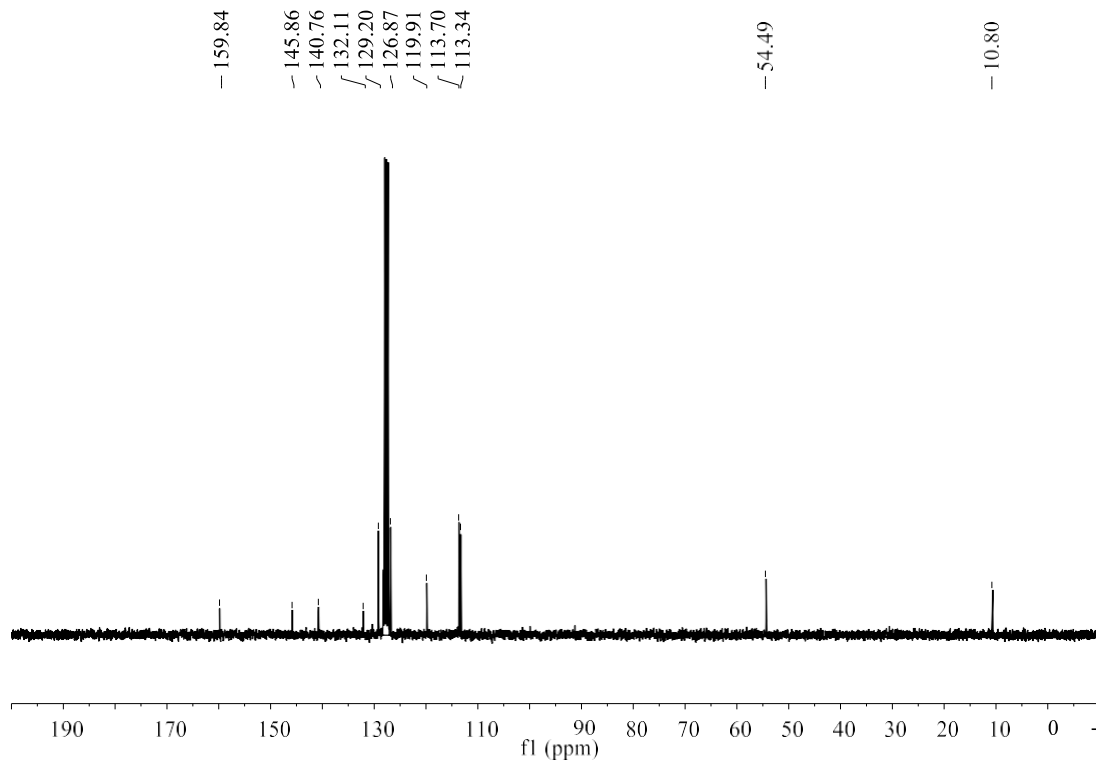

$^1\text{H}$  NMR

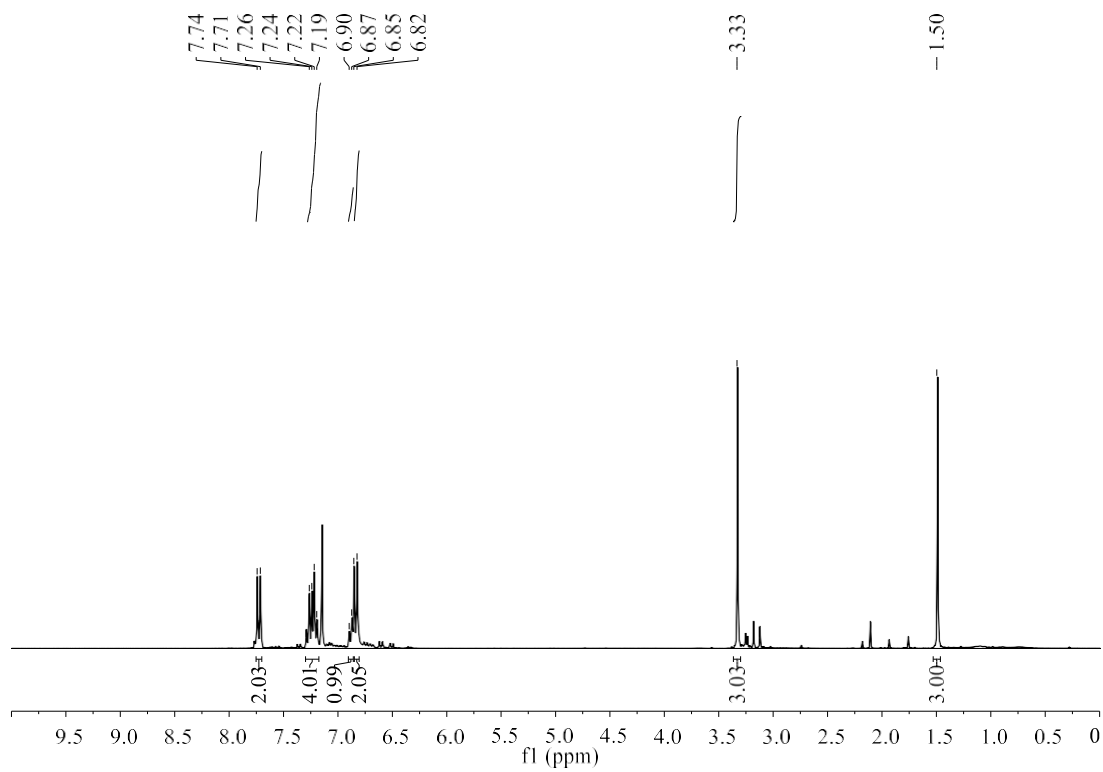

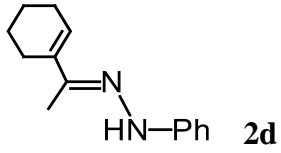

<sup>13</sup>C NMR

145.94  
142.93  
137.56  
129.12  
125.66  
119.68  
113.18

26.01  
24.77  
22.87  
22.57  
-9.08

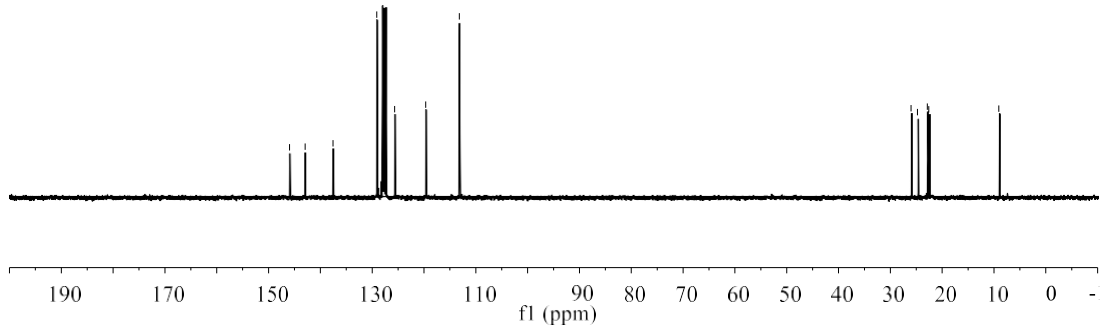

<sup>1</sup>H NMR

7.25  
7.23  
7.20  
7.15  
7.12  
7.10  
6.86  
6.84  
6.81  
5.82  
5.80  
5.79

2.65  
2.63  
2.60  
2.05  
1.64  
1.62  
1.60  
1.58  
1.55  
1.53  
1.51  
1.49  
1.26

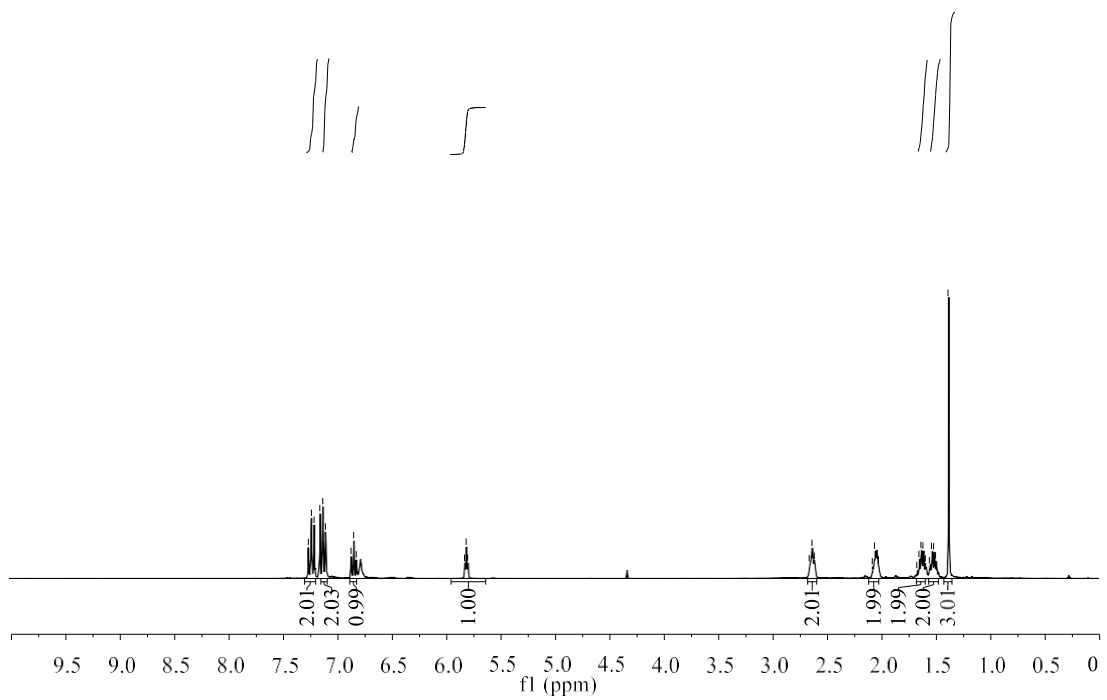

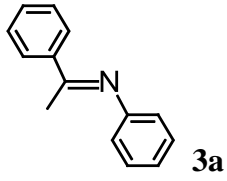

<sup>13</sup>C NMR

-164.43  
-152.13  
139.46  
130.22  
128.93  
128.10  
127.29  
123.04  
119.38

-16.48

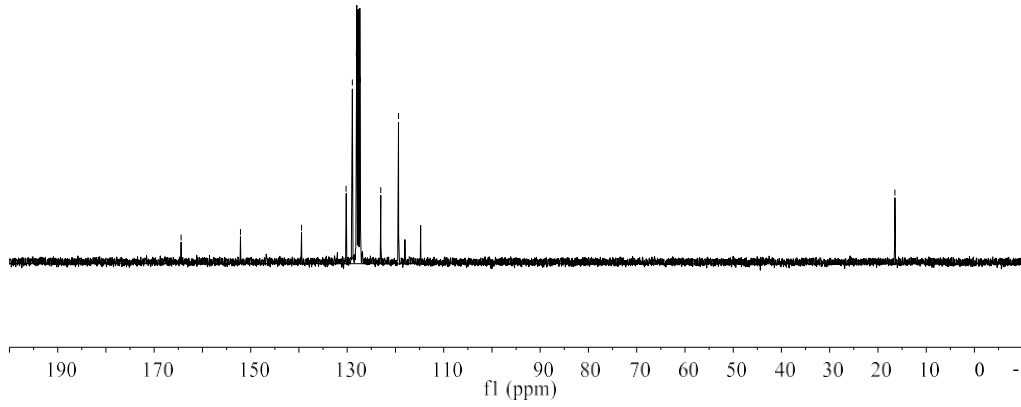

<sup>1</sup>H NMR

7.95  
7.94  
7.92  
7.22  
7.18  
7.17  
7.17  
6.97  
6.95  
6.92  
6.76  
6.74

-1.84

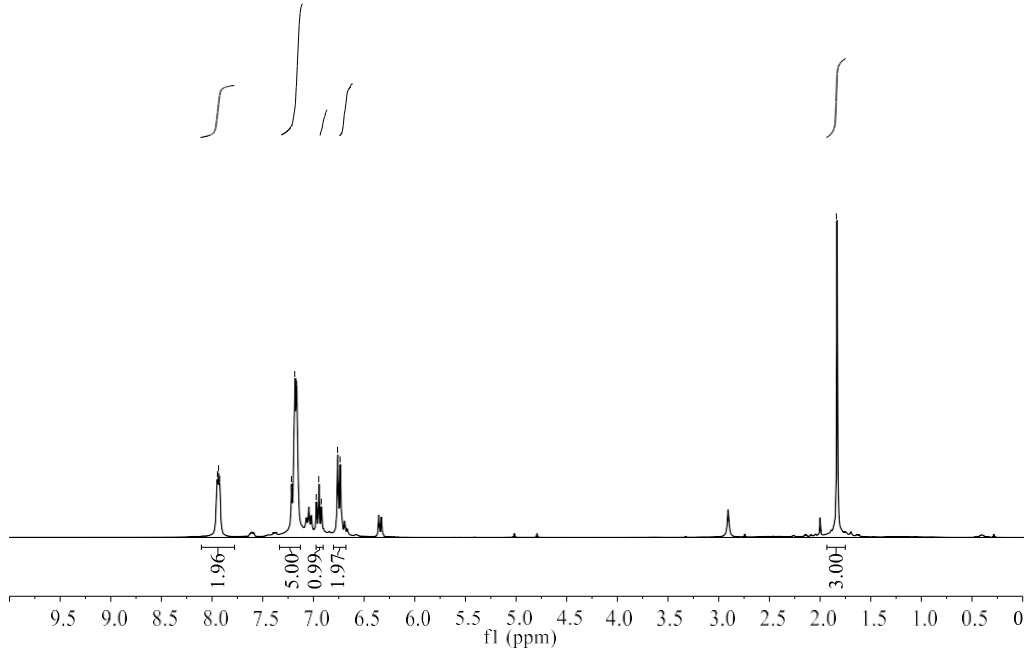

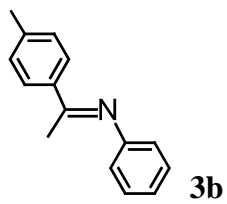

<sup>13</sup>C NMR

- 164.50  
- 152.18  
/ 140.36  
/ 136.91  
/ 128.92  
/ 128.89  
/ 127.34  
/ 122.97  
/ 119.50  
  
- 20.90  
- 16.53

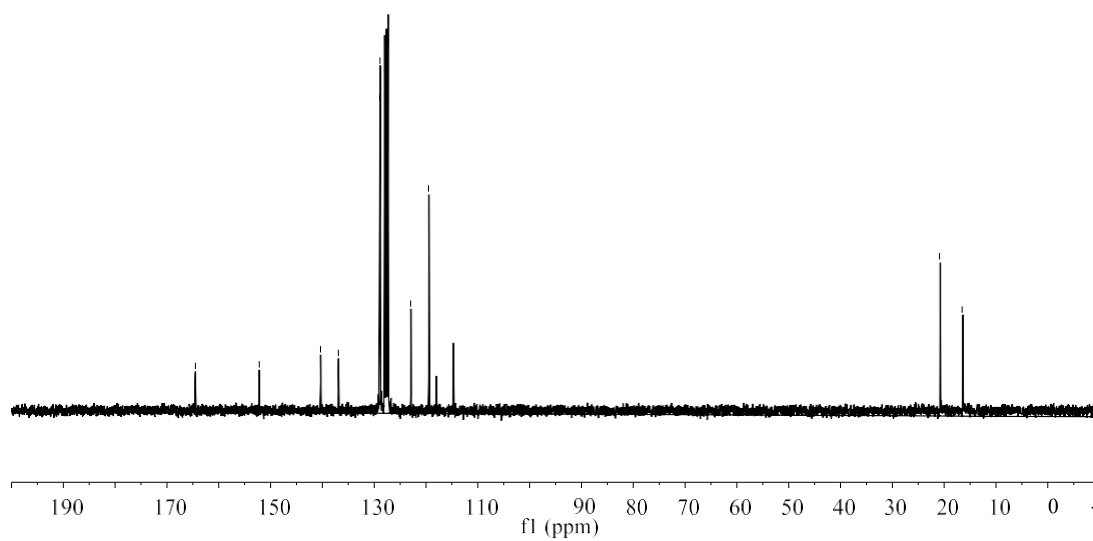

<sup>1</sup>H NMR

< 7.91  
7.88  
7.22  
7.19  
7.17  
7.03  
7.00  
6.77  
6.74  
  
- 2.10  
- 1.87

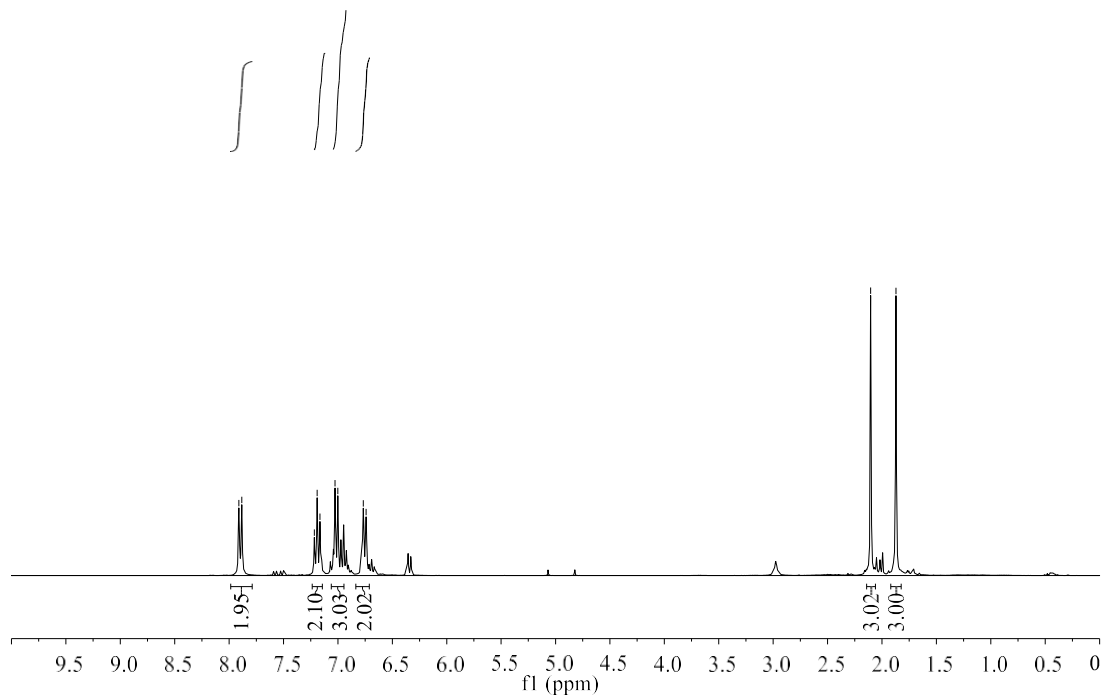

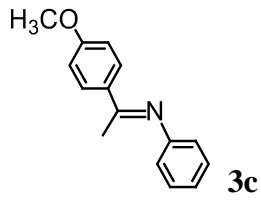

<sup>13</sup>C NMR

163.72  
161.71  
152.32  
132.15  
128.99  
128.92  
122.87  
119.65  
113.49

-54.56

-16.40

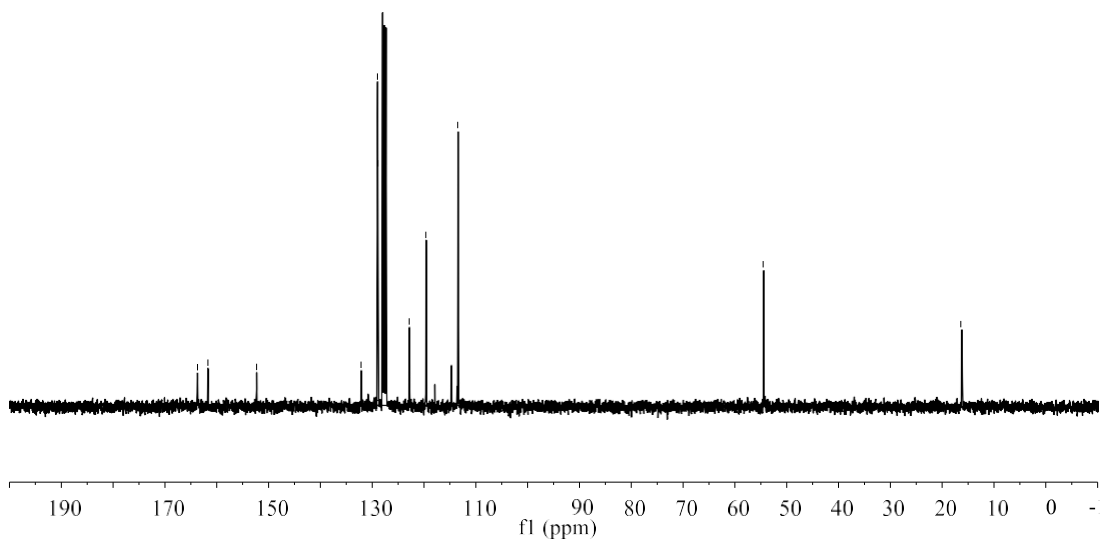

<sup>1</sup>H NMR

7.96  
7.93  
7.22  
7.20  
7.17  
6.97  
6.95  
6.92  
6.79  
6.76

-3.31

-1.89

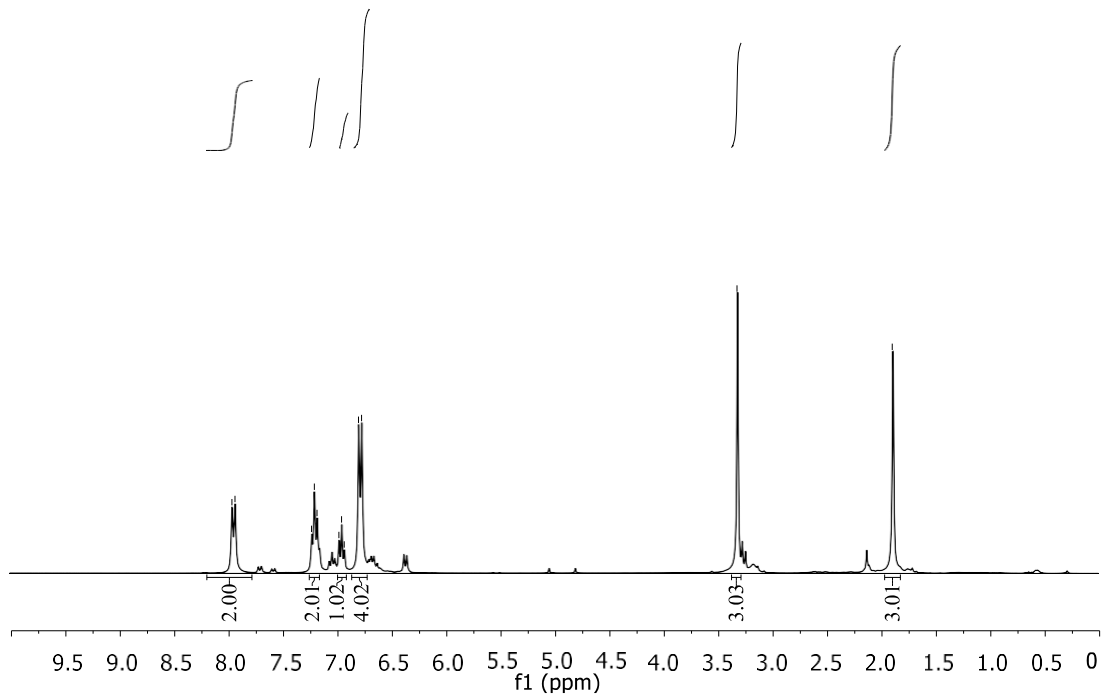

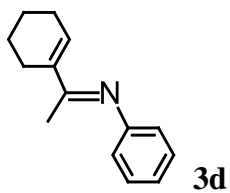

<sup>13</sup>C NMR

- 165.88  
 - 152.52  
 ~ 139.46  
 ~ 133.30  
 ~ 128.79  
 ~ 122.62  
 ~ 119.35  
 ~ 26.01  
 ~ 24.71  
 ~ 22.59  
 ~ 22.07  
 ~ 15.22

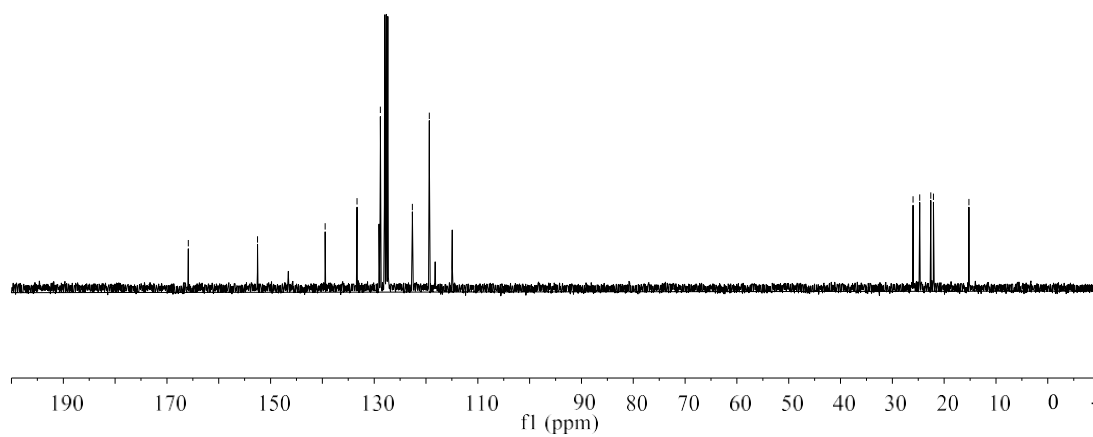

<sup>1</sup>H NMR

7.19  
 7.14  
 6.94  
 6.91  
 6.89  
 6.70  
 6.67  
 6.18  
 6.16  
 6.15  
 2.60  
 2.58  
 2.56  
 2.00  
 1.97  
 1.95  
 1.69  
 1.59  
 1.55  
 1.51  
 1.48  
 1.44  
 1.40

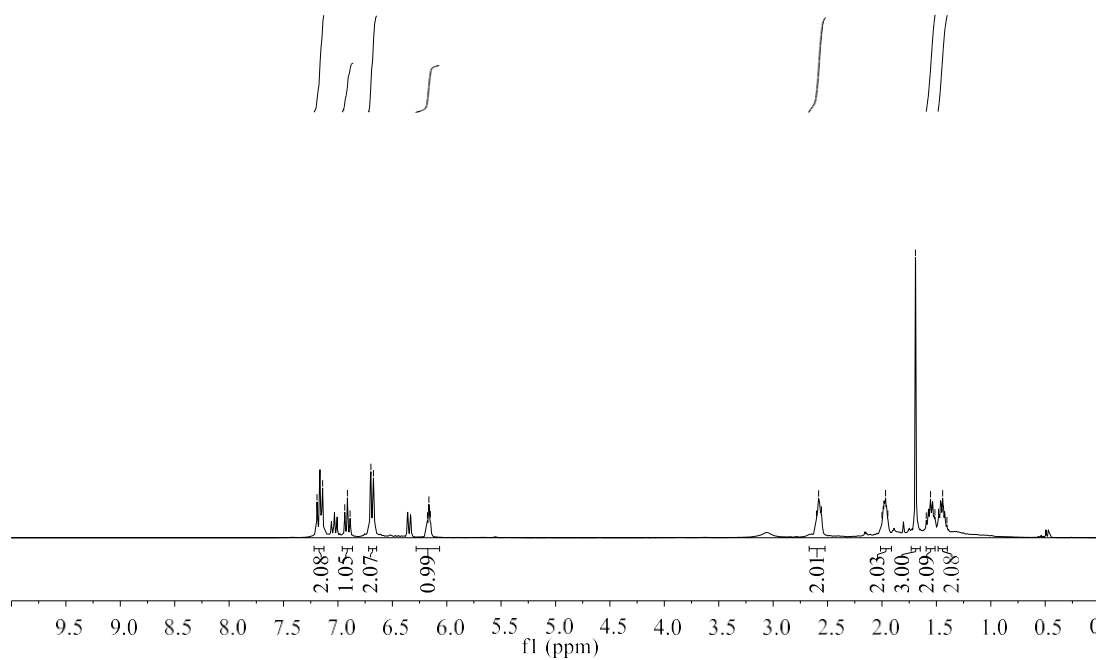

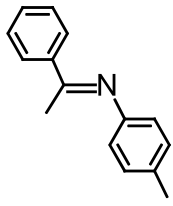

**4a**

<sup>13</sup>C NMR

- 164.46  
- 149.55  
- 139.66  
- 132.19  
- 130.12  
- 129.53  
- 128.09  
- 127.25  
- 119.45

- 20.51  
- 16.45

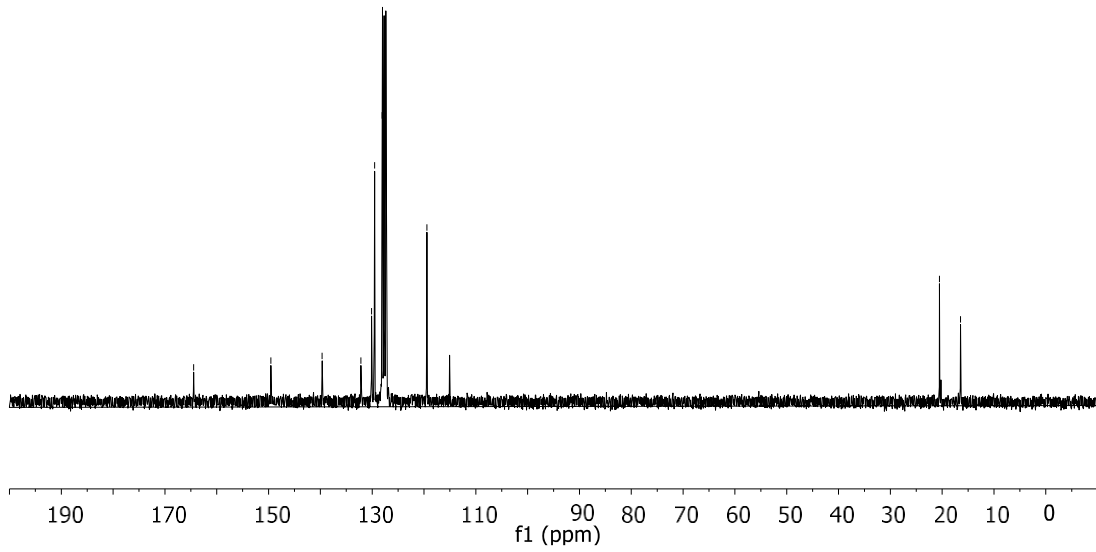

<sup>1</sup>H NMR

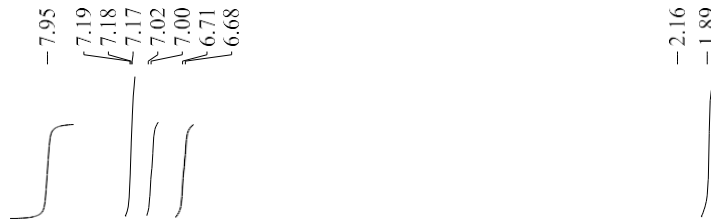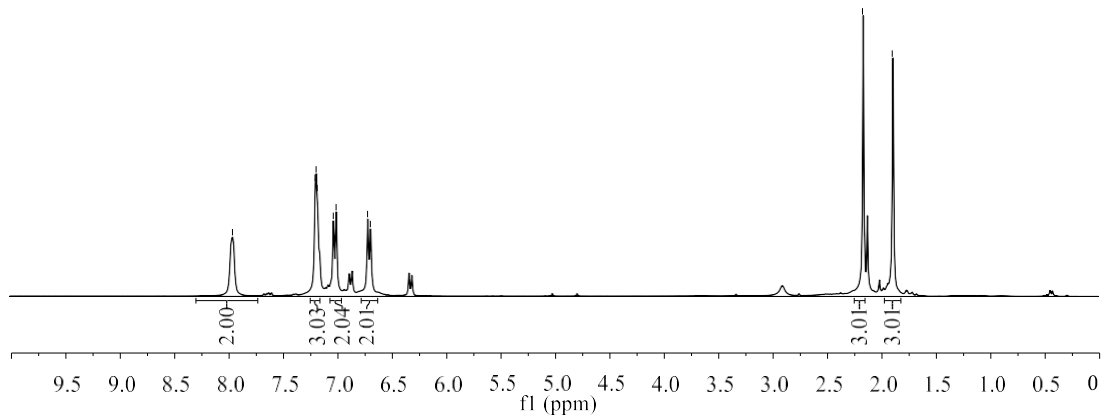



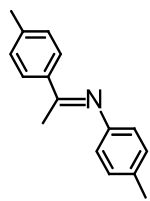

**4b**

$^{13}\text{C}$  NMR

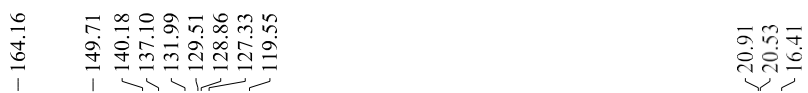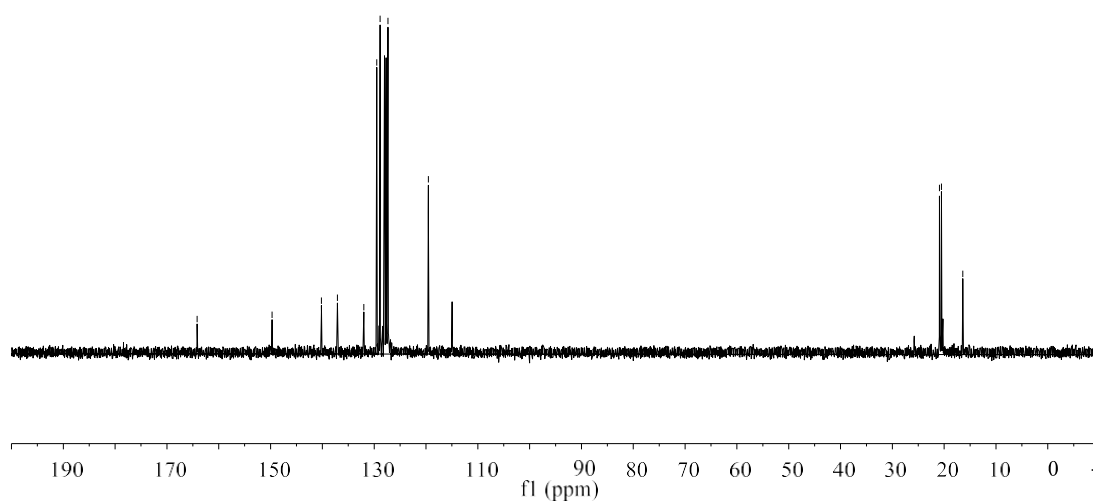

$^1\text{H}$  NMR

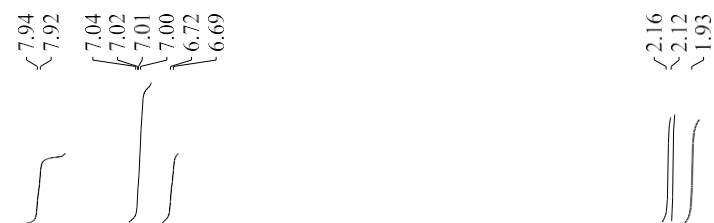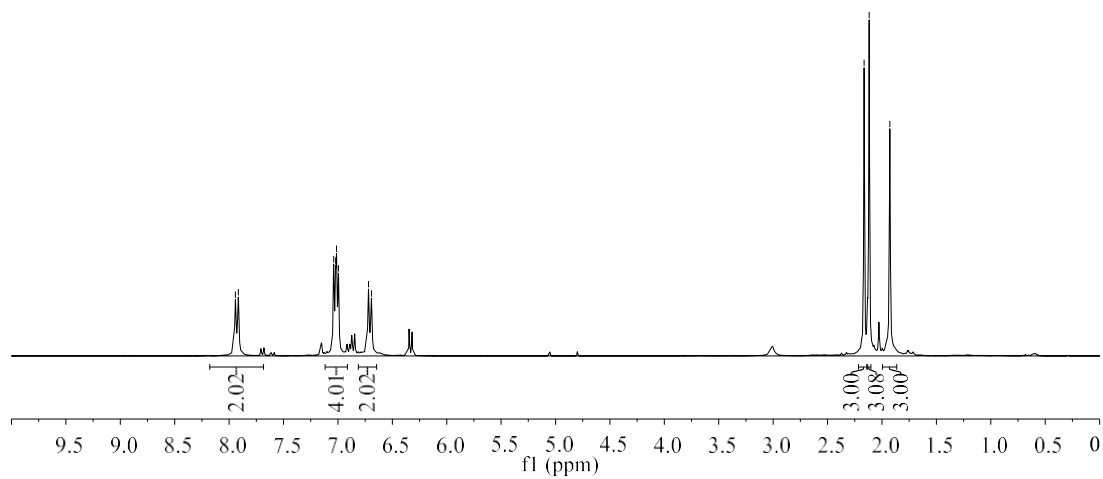

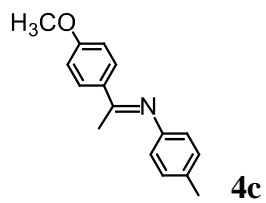

<sup>13</sup>C NMR

163.58  
 161.62  
 149.79  
 132.37  
 131.92  
 129.52  
 128.94  
 119.68  
 113.47  
 54.55  
 20.52  
 16.33

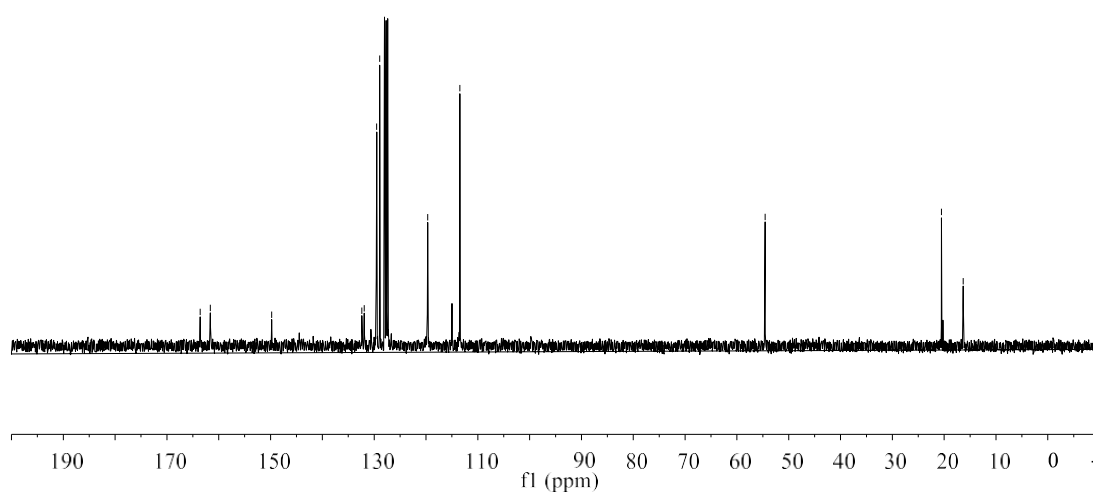

<sup>1</sup>H NMR

7.98  
 7.95  
 7.03  
 7.00  
 6.80  
 6.77  
 6.73  
 6.71  
 3.33  
 2.17  
 1.93

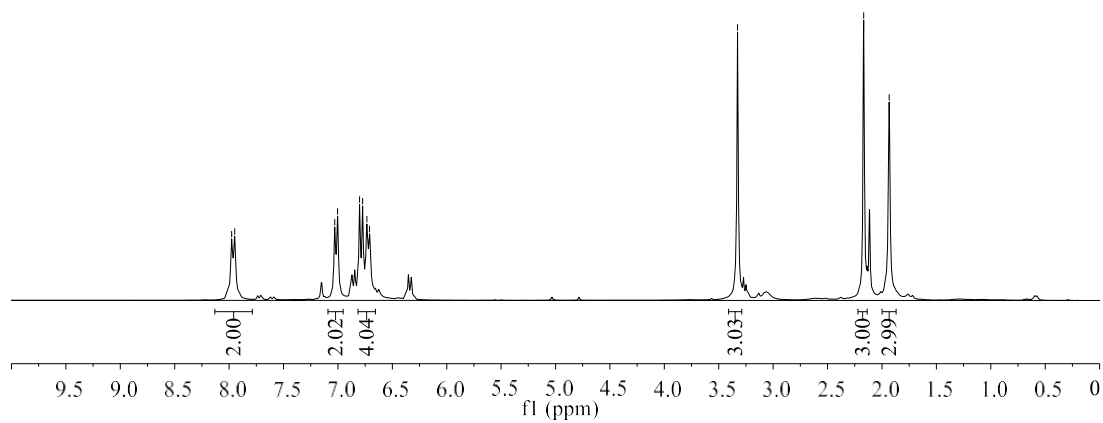

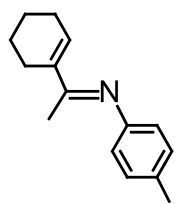

**4d**

<sup>13</sup>C NMR

- 165.62  
 - 150.04  
 / 139.70  
 / 132.85  
 / 131.60  
 \ 129.37  
 - 119.37  
 / 26.03  
 / 24.77  
 / 22.64  
 / 22.14  
 / 20.47  
 / 15.11

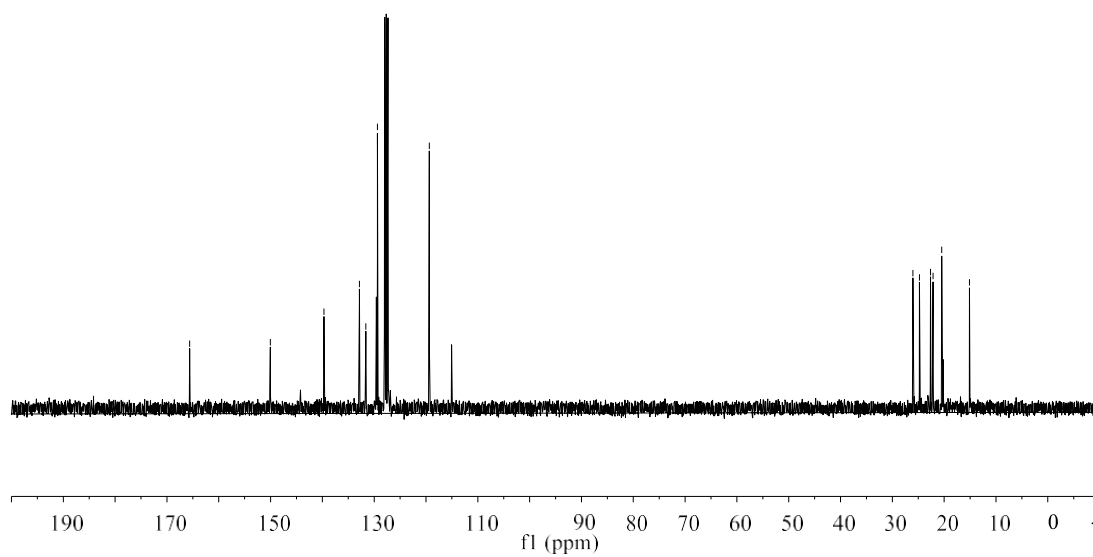

<sup>1</sup>H NMR

/ 7.00  
 / 6.97  
 / 6.65  
 / 6.62  
 / 6.19  
 / 6.18  
 / 6.17  
 - 2.62  
 / 2.15  
 / 2.01  
 / 2.00  
 / 1.99  
 / 1.98  
 / 1.74  
 / 1.59  
 / 1.57  
 / 1.55  
 / 1.47  
 / 1.46

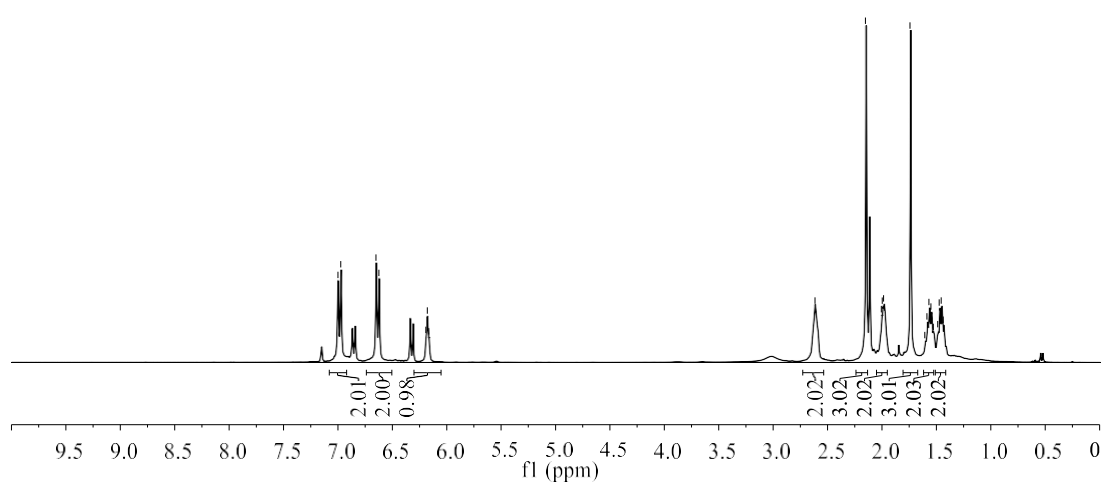

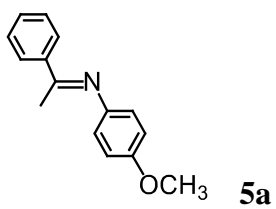

<sup>13</sup>C NMR

- 164.56  
- 156.22  
- 145.09  
- 139.80  
- 130.08  
- 128.10  
- 127.23  
- 120.79  
- 114.32  
  
- 54.71  
  
- 16.42

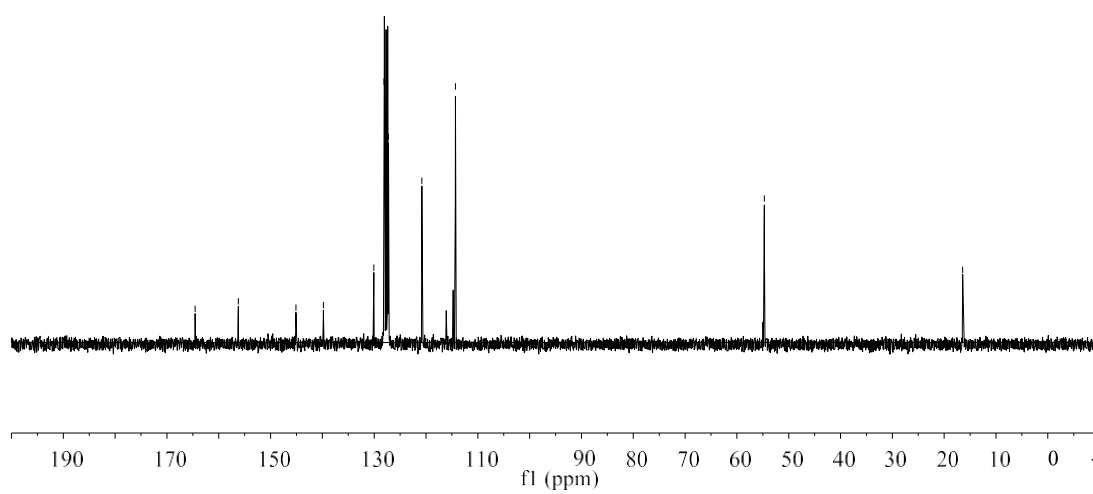

<sup>1</sup>H NMR

7.99  
7.98  
7.97  
7.20  
7.19  
7.18  
6.83  
6.80  
6.72  
6.70  
  
3.37  
  
1.92

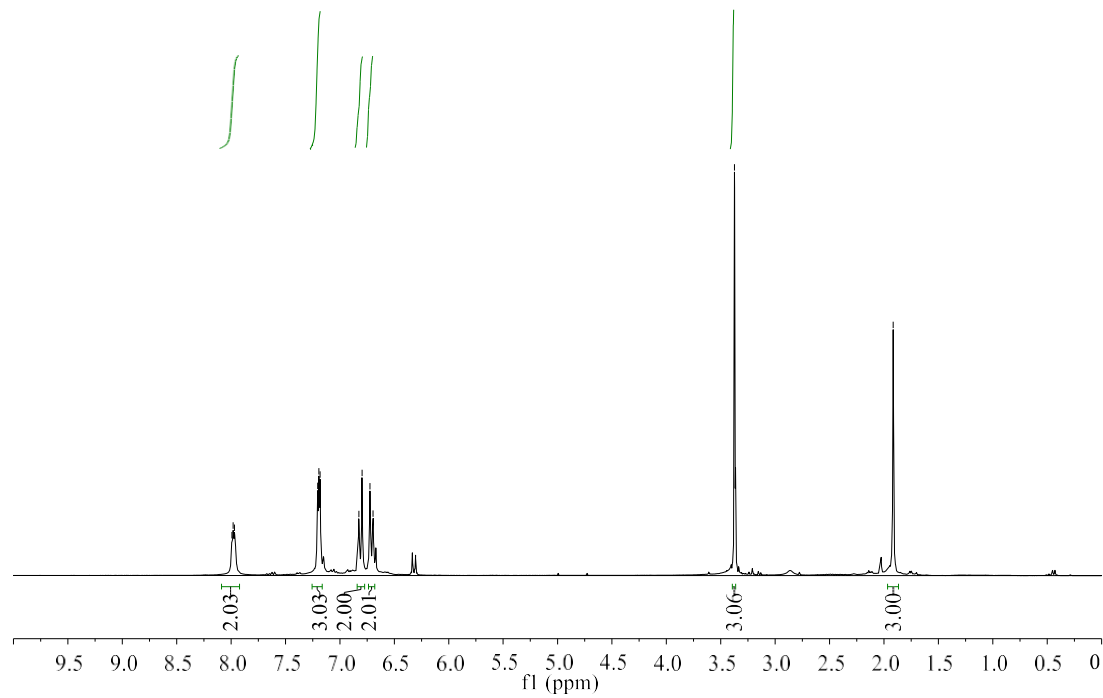

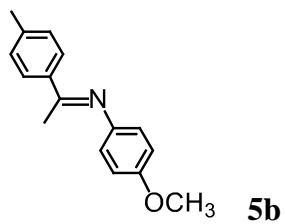

<sup>13</sup>C NMR

-164.35  
 -156.11  
 -145.25  
 -140.14  
 -137.24  
 -128.87  
 -127.30  
 -120.86  
 -114.29  
  
 -54.70  
  
 -20.91  
 -16.40

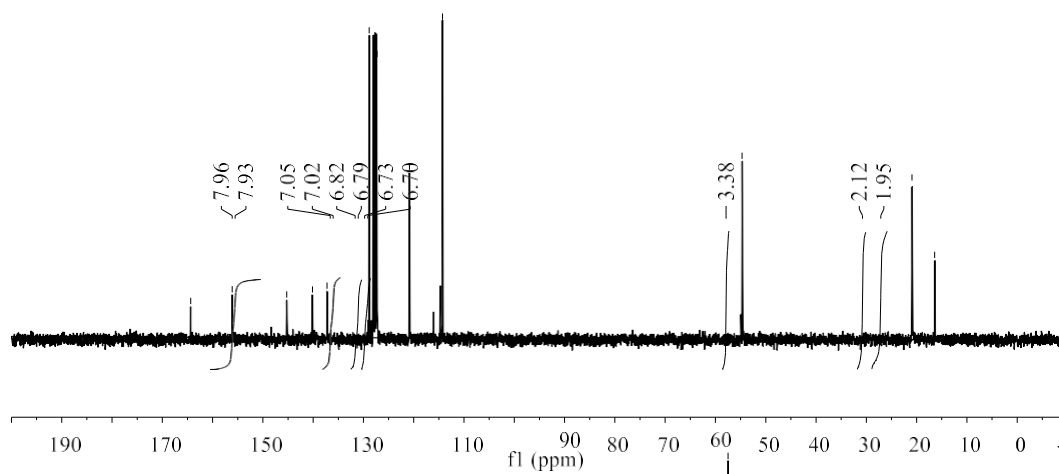

<sup>1</sup>H NMR

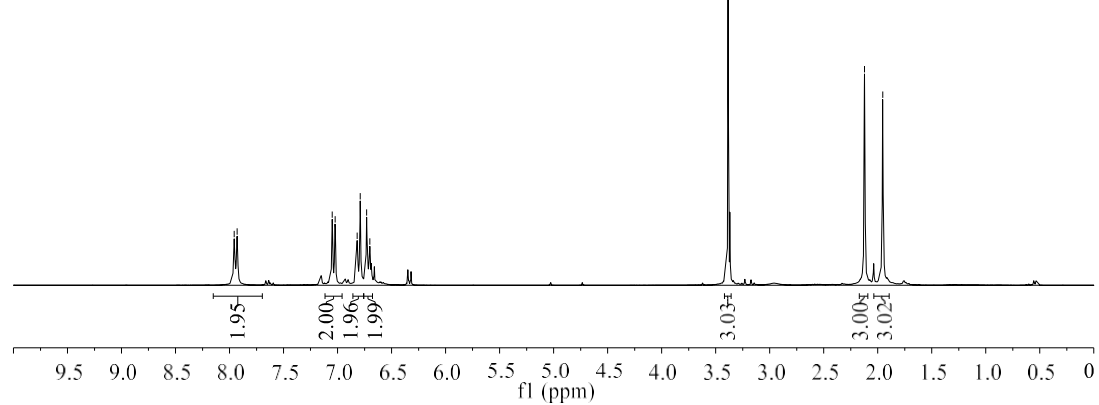

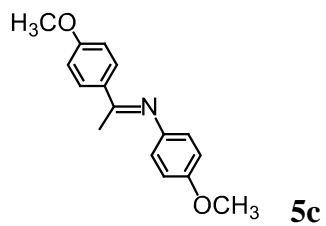

<sup>13</sup>C NMR

- 164.94
- 161.48
- 155.84
- 145.01
- 132.47
- 128.77
- 120.92
- 114.25
- 113.60
- 55.48
- 55.37
- 17.11

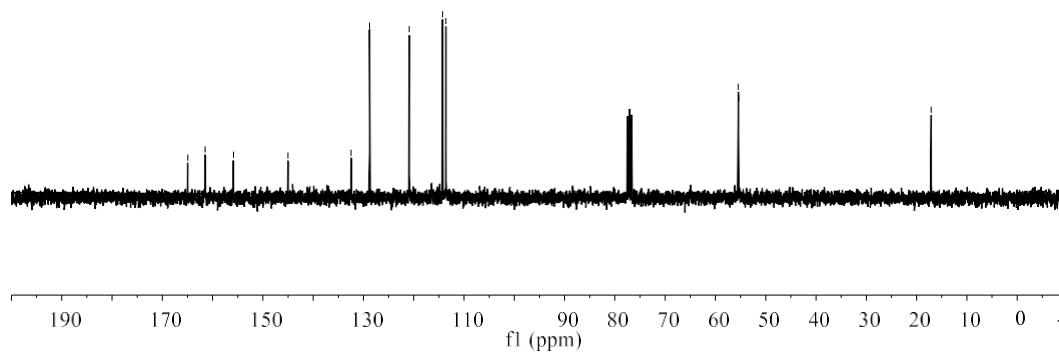

<sup>1</sup>H NMR

- 7.97
- 7.95
- 6.98
- 6.96
- 6.95
- 6.92
- 6.79
- 6.76
- 3.88
- 3.83
- 2.24

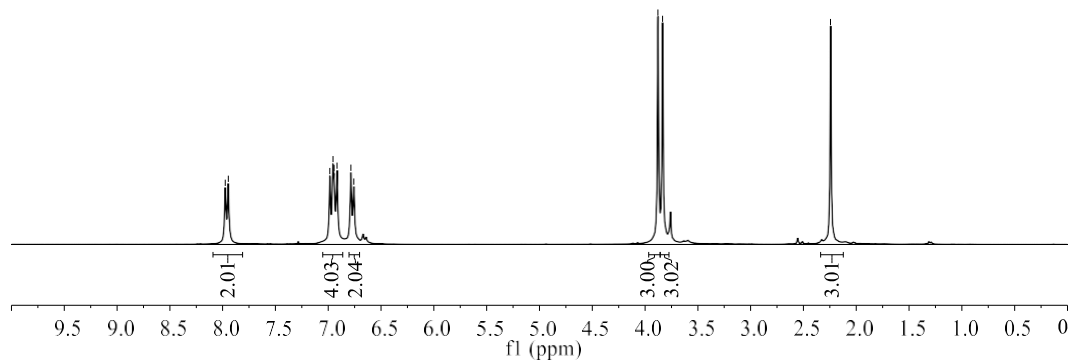

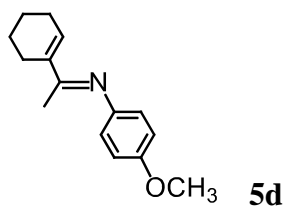

$^{13}\text{C}$  NMR

- 165.69  
 - 155.83  
 - 145.68  
 - 139.86  
 - 132.68  
 - 120.60  
 - 114.17  
 - 54.68  
 - 26.05  
 - 24.81  
 - 22.68  
 - 22.18  
 - 15.05

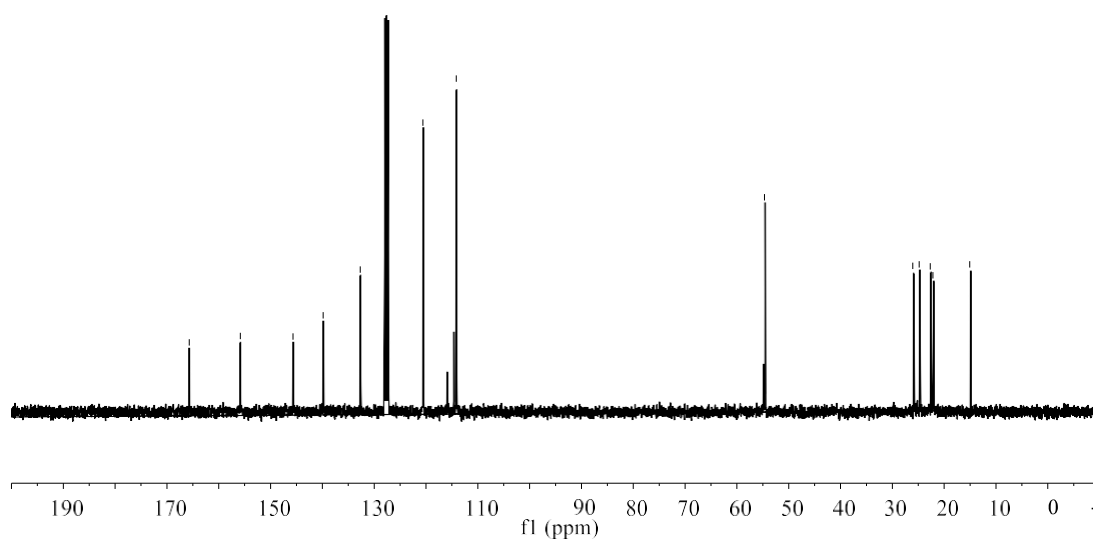

$^1\text{H}$  NMR

6.80  
 6.77  
 6.67  
 6.64  
 6.21  
 6.19  
 6.18  
 - 3.38  
 2.65  
 2.62  
 2.02  
 2.00  
 1.99  
 1.77  
 1.60  
 1.58  
 1.56  
 1.48  
 1.46  
 1.44

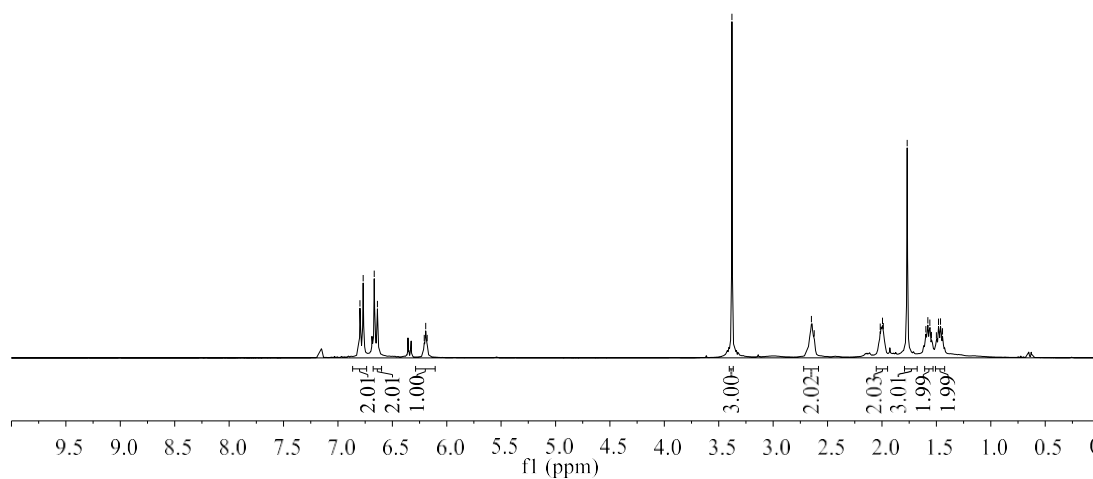

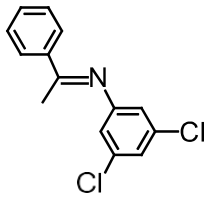**6a**<sup>13</sup>C NMR

- 166.43  
- 153.91  
/ 138.47  
/ 135.23  
/ 130.81  
- 128.18  
/ 127.29  
/ 122.85  
/ 117.90

- 16.63

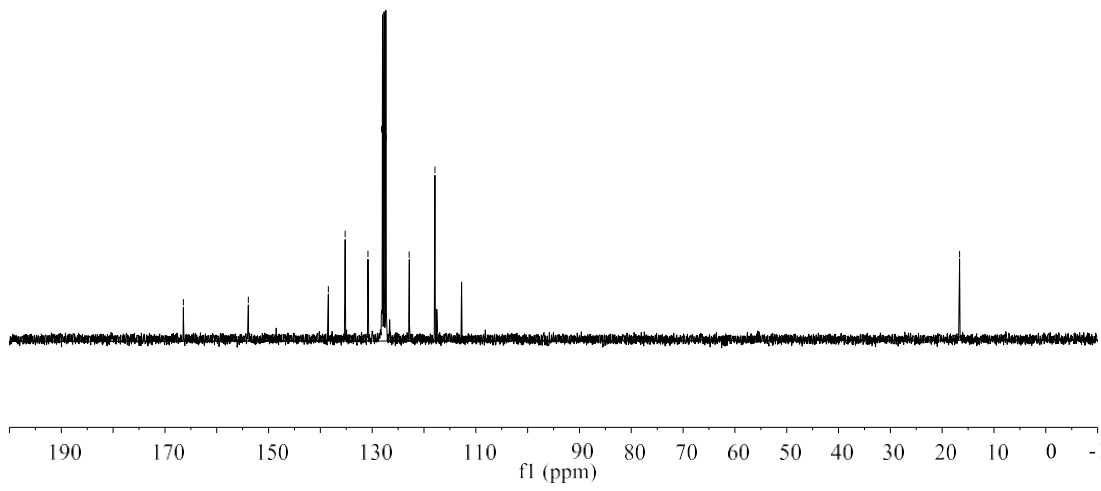<sup>1</sup>H NMR

< 7.79  
< 7.76  
/ 7.18  
/ 6.93  
/ 6.49

- 1.59

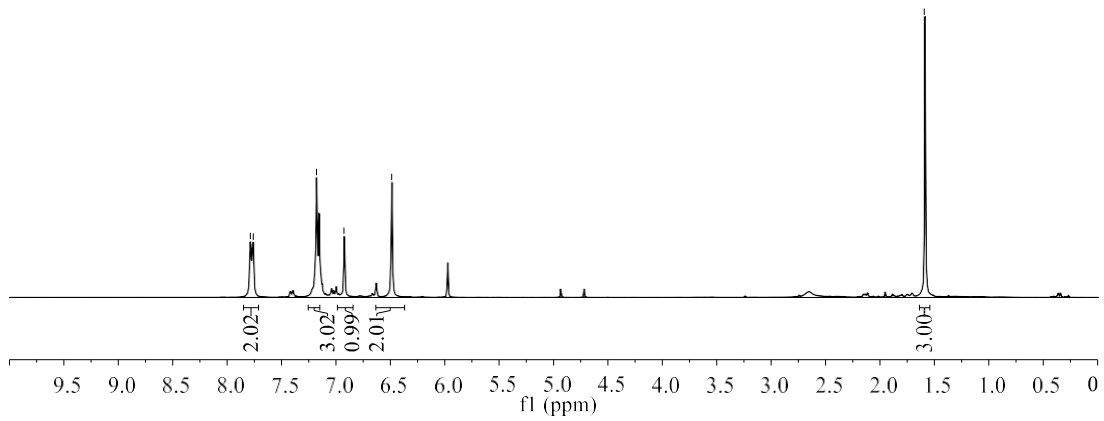



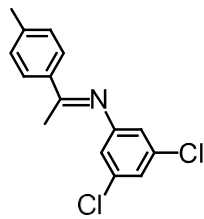

**6b**

<sup>13</sup>C NMR

|   |        |   |       |
|---|--------|---|-------|
| - | 166.06 | - | 20.96 |
| - | 154.16 | - | 16.59 |
| / | 141.11 |   |       |
| / | 135.90 |   |       |
| / | 135.15 |   |       |
| / | 128.96 |   |       |
| / | 127.37 |   |       |
| / | 122.65 |   |       |
| / | 118.01 |   |       |

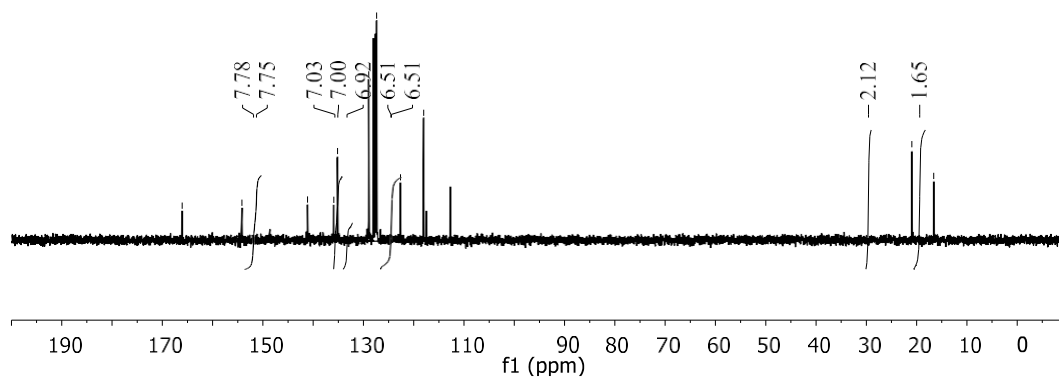

<sup>1</sup>H NMR

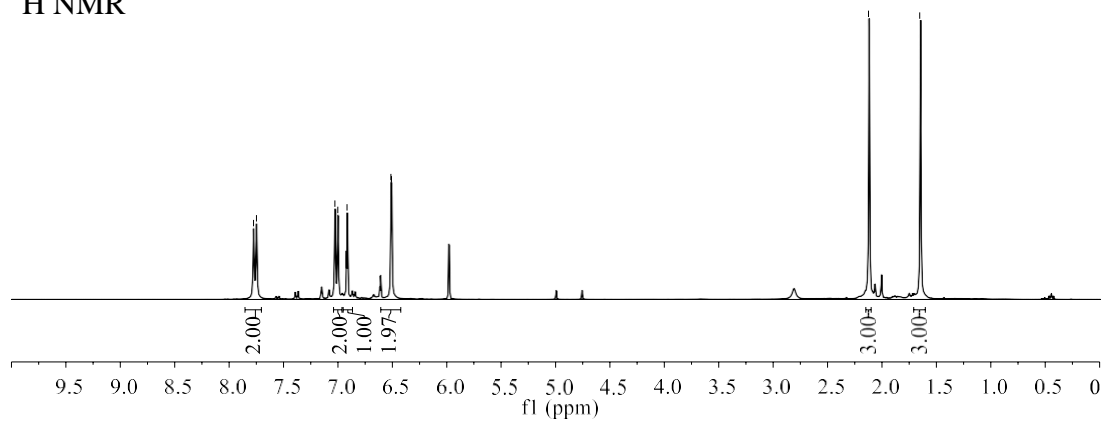

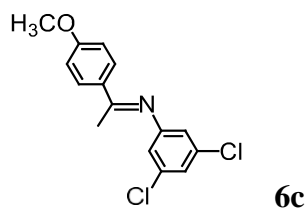

<sup>13</sup>C NMR

~ 165.49  
 ~ 162.11  
 ~ 154.24  
 ~ 135.15  
 ~ 131.13  
 ~ 129.12  
 ~ 122.59  
 ~ 118.21  
 ~ 113.55

-54.59

-16.51

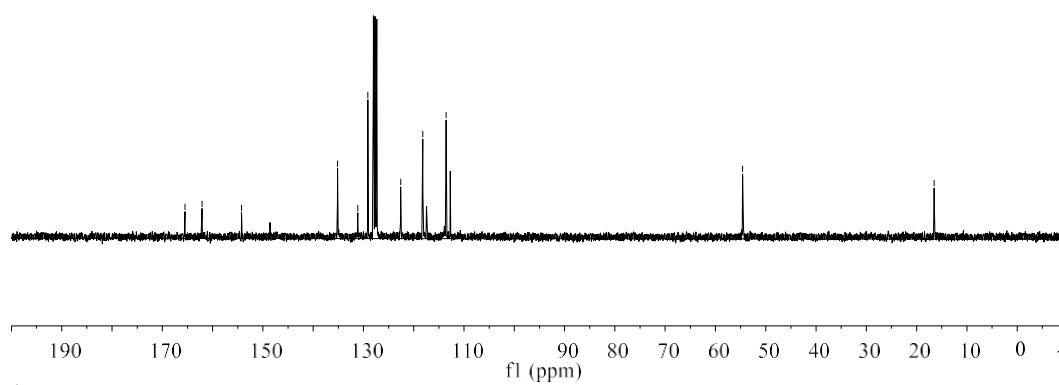

<sup>1</sup>H NMR

~ 7.81  
 ~ 7.79  
 ~ 6.93  
 ~ 6.78  
 ~ 6.75  
 ~ 6.54

-3.34

-1.66

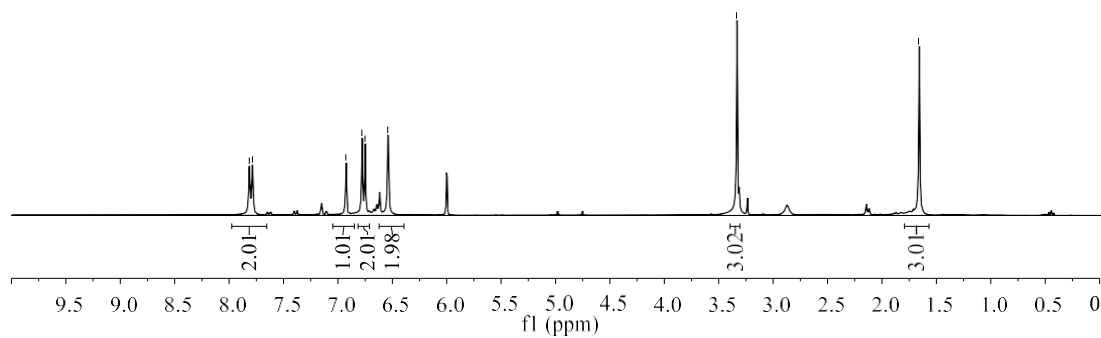

6.90  
6.47  
6.46  
6.14  
6.12  
6.11

**6d**

<sup>13</sup>C NMR

167.14  
154.59  
138.89  
135.02  
134.76  
122.23  
117.84

26.05  
24.45  
22.44  
21.93  
15.25

2.43  
2.40  
1.97  
1.95  
1.93  
1.55  
1.54  
1.52  
1.47  
1.45  
1.43  
1.41

190 170 150 130 110 90 80 70 60 50 40 30 20 10 0 -  
fl (ppm)

<sup>1</sup>H NMR

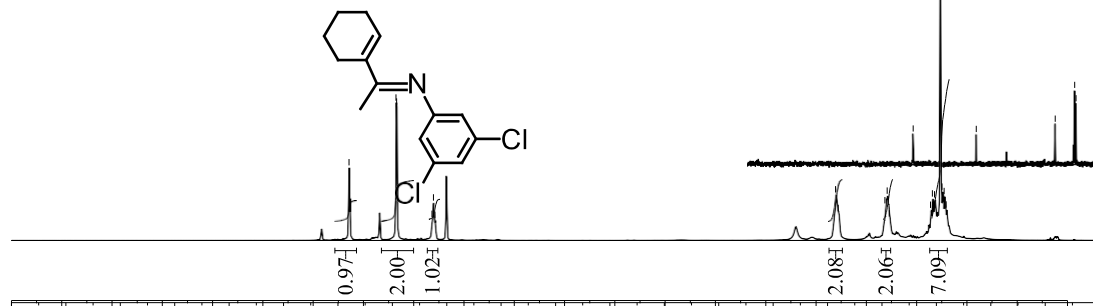

9.5 9.0 8.5 8.0 7.5 7.0 6.5 6.0 5.5 5.0 4.5 4.0 3.5 3.0 2.5 2.0 1.5 1.0 0.5 0  
fl (ppm)
